# Supplementary material for: Electrocatalytic activity of Nb-doped hexagonal WO3 nanowire-modified graphite felt as a positive electrode for vanadium redox flow batteries
Source: Royal Society of Chemistry journal article supplement (doi:10.1039/c6ta03936g), 2016-01-01
Supplement: c6ta03936g1.pdf [file c6ta03936g1.pdf]

**Supporting information**

**Electrocatalytic Activity of Nb-Doped Hexagonal WO<sub>3</sub> Nanowires-Modified Graphite Felt as a  
Positive Electrode for Vanadium Redox Flow Battery**

Daniel Manaye Kabtamu, Jian-Yu Chen, Yu-Chung Chang, and Chen-Hao Wang\*

Department of Materials Science and Engineering, National Taiwan University of Science and  
Technology, 10607, Taipei, Taiwan.

\*Corresponding author, E-mail: [chwang@mail.ntust.edu.tw](mailto:chwang@mail.ntust.edu.tw)

Tel: +886-2-2730-3715; Fax: +886-2-2737-6544

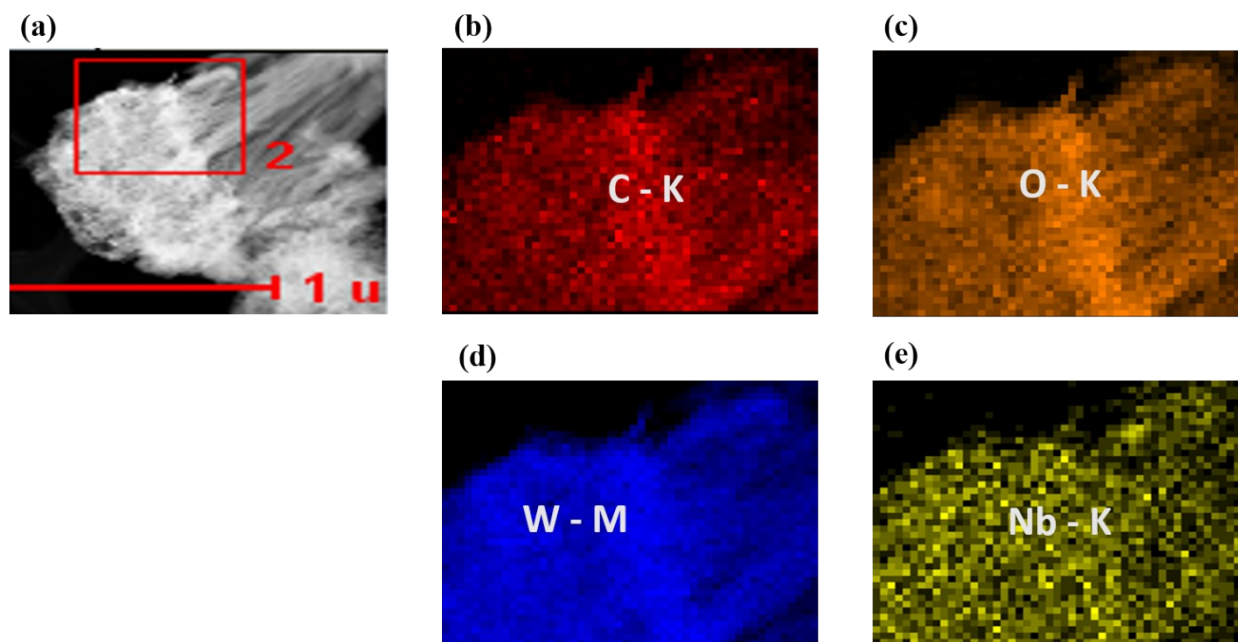

**Figure S1.** (a) The high-angle annular dark-field (HAADF) STEM image of the Nb-doped  $h\text{-WO}_3$  NWs-modified GF ( $\text{Nb}/\text{W} = 0.03$ ), and the corresponding elemental mapping of (b) C, (c) O, (d) W, and (e) Nb.

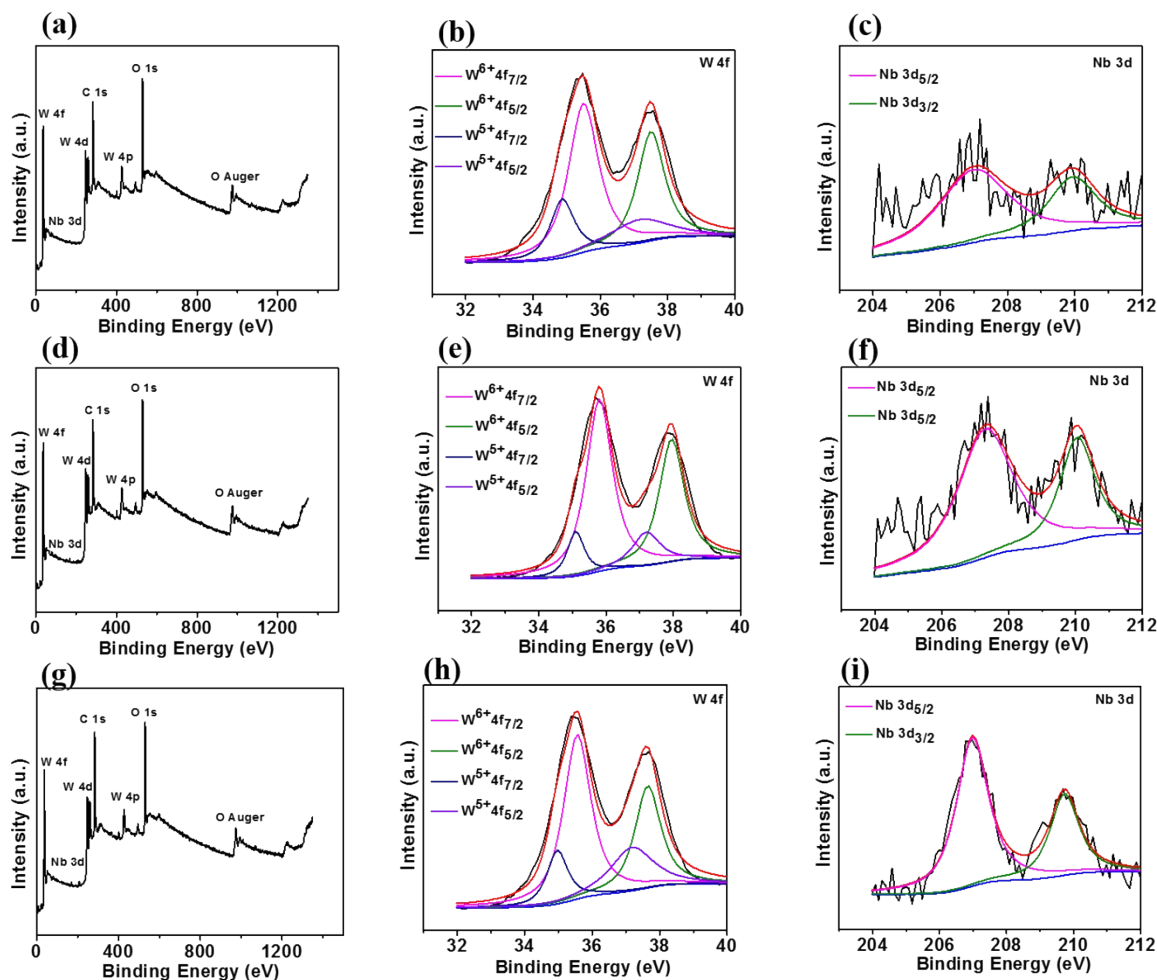

**Figure S2.** XPS patterns of wide-scan survey spectrum for Nb-doped h-WO<sub>3</sub> NWs (a) Nb/W = 0.01, (d) Nb/W = 0.03, and (g) Nb/W = 0.06; (b), (e), and (h) Narrow-scan W 4f of Nb-doped h-WO<sub>3</sub> NWs with the atomic ratio of Nb/W is 0.01, 0.03, and 0.06, respectively; (c), (f), and (i) Narrow-scan Nb 3d of Nb-doped h-WO<sub>3</sub> NWs with the atomic ratio of Nb/W is 0.01, 0.03, and 0.06, respectively.
